# Supplementary material for: Fe doped NiS nanosheet arrays grown on carbon fiber paper for a highly efficient electrocatalytic oxygen evolution reaction
Source: Royal Society of Chemistry journal article supplement (doi:10.1039/d2na00004k), 2022-01-01
Supplement: d2na00004k1.pdf [file d2na00004k1.pdf]

Supporting Information (SI):

# Fe doped NiS nanosheet arrays grown on carbon fiber paper for highly efficient electrocatalytic oxygen evolution reaction

Wenrui Li<sup>®</sup>, Haofei Zhao<sup>®</sup>, Hao Li, Rongming Wang\*

*<sup>a</sup> Beijing Advanced Innovation Center for Materials Genome Engineering, Beijing Key  
Laboratory for Magneto-Photoelectrical Composite and Interface Science, School of  
Mathematics and Physics, University of Science and Technology Beijing, Beijing 100083, China.*

**E-mail:** [rmwang@ustb.edu.cn](mailto:rmwang@ustb.edu.cn)

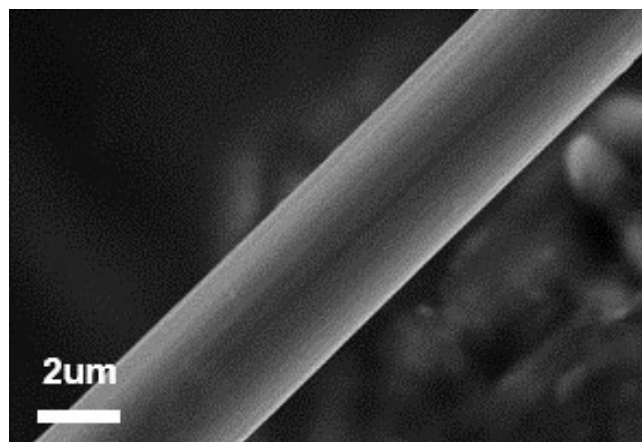

**Fig. S1** SEM image of a single carbon fiber with clean surface in CFP before the synthesis.

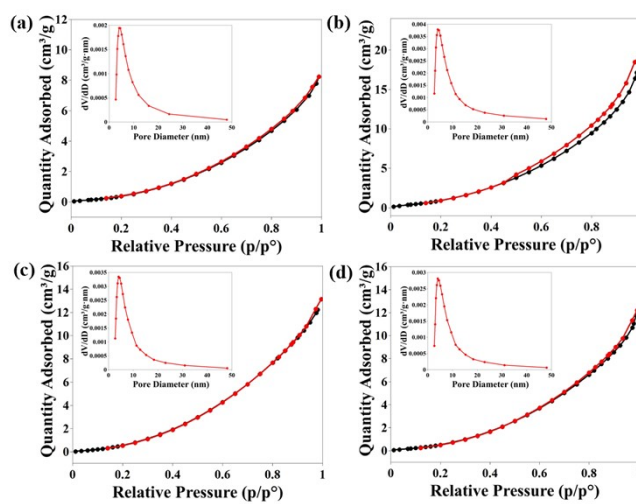

**Fig. S2** N<sub>2</sub> Adsorption-desorption isotherm for (a) Fe-NiS@CFP, (b) NiFe LDH@CFP, (c) NiS@CFP and (d) Ni LDH@CFP. Inset: corresponding to BJH pore-size distribution curves.

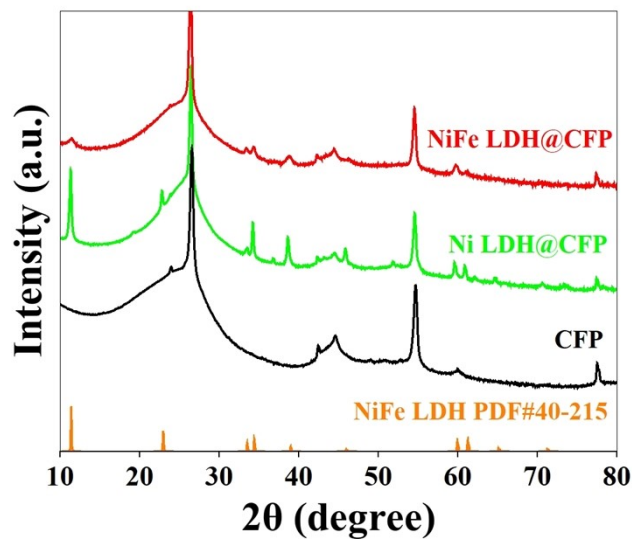

**Fig. S3** XRD spectra of the NiFe LDH@CFP, Ni LDH@CFP and CFP.

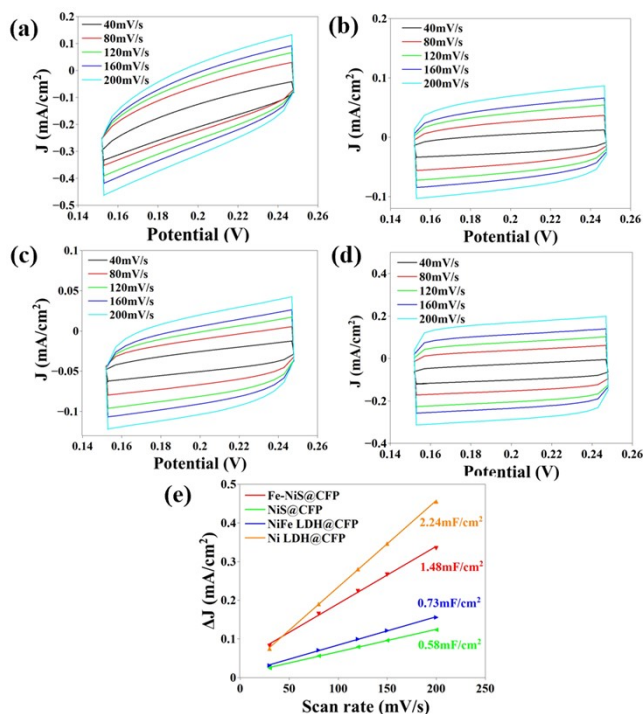

**Fig. S4** Cyclic voltammograms of (a) Fe-NiS@CFP, (b) NiFe LDH@CFP, (c) NiS@CFP and (d) Ni LDH@CFP with various scan rates (40–200 mV/s) in the region of 0.15–0.25 V. (e) The capacitive current density at 0.20 V as a function of scan rate for samples.

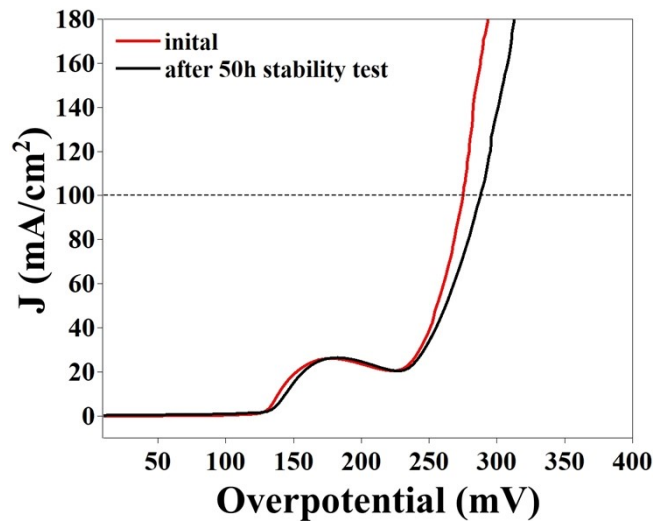

**Fig. S5** LSV curve for Fe-NiS@CFP before and after the stability test ( $\sim 100 \text{ mA/cm}^2$ , 50 h).

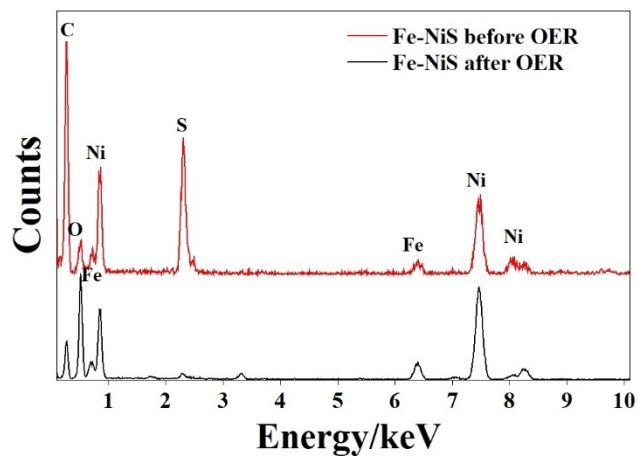

**Fig. S6** EDX spectra of Fe-NiS@CFP before and after the stability test ( $\sim 100 \text{ mA/cm}^2$ , 50 h).

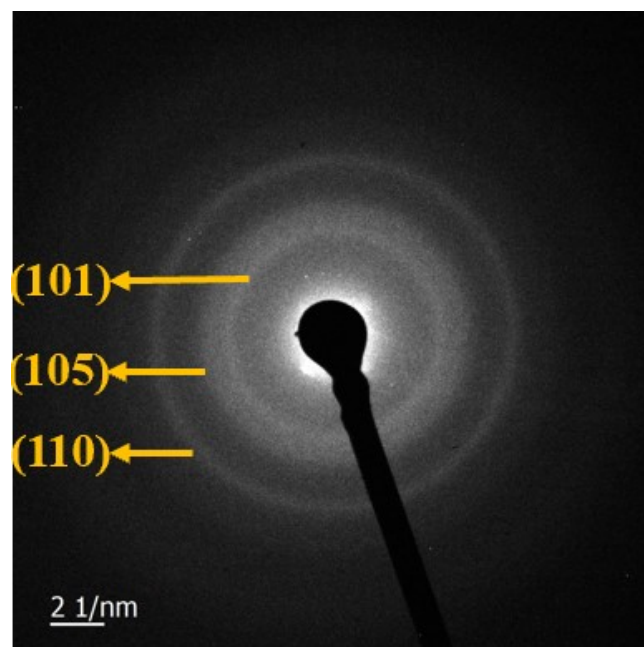

**Fig. S7** SAED pattern of Fe-NiS@CFP after the stability test ( $\sim 100 \text{ mA/cm}^2$ , 50 h).

**Table S1.** The fitting parameters of the electrochemical impedance spectra of as prepared catalysts.

| <b>Catalysts</b>    | <b>Rs (<math>\Omega</math>)</b> | <b>Rct<sub>1</sub> (<math>\Omega</math>)</b> | <b>CPE<sub>1</sub></b> | <b>Rct<sub>2</sub> (<math>\Omega</math>)</b> | <b>CPE<sub>2</sub></b> |
|---------------------|---------------------------------|----------------------------------------------|------------------------|----------------------------------------------|------------------------|
| <b>Ni LDH@CFP</b>   | 1.48                            | 0.33                                         | 0.81                   | 4.21                                         | 0.67                   |
| <b>NiS@CFP</b>      | 1.36                            | 0.28                                         | 0.83                   | 3.47                                         | 0.61                   |
| <b>NiFe LDH@CFP</b> | 1.70                            | 0.25                                         | 0.77                   | 2.56                                         | 0.74                   |
| <b>Fe-NiS@CFP</b>   | 1.60                            | 0.38                                         | 0.76                   | 2.14                                         | 0.72                   |
